# Supplementary material for: Donor sex, age and ethnicity impact stored red blood cell antioxidant metabolism through mechanisms in part explained by glucose 6-phosphate dehydrogenase levels and activity
Source: PubMed Central journal article supplement — Haematologica. 2020 Apr 2;106(5):1290–302. doi: 10.3324/haematol.2020.246603 (PMC8094095; doi:10.3324/haematol.2020.246603), 2020-04-02
Supplement: 2020_246603-DisclosuresContributions.pdf [file 2020_246603-DisclosuresContributions.pdf]

Haematologica  
HAEMATOL/2020/246603  
Version 3

Donor sex, age and ethnicity impact stored red blood cell antioxidant metabolism through mechanisms in part explained by glucose 6-phosphate dehydrogenase levels and activity

Angelo D'Alessandro, Xiaoyun Fu, Tamir Kaniias, Julie A. Reisz, Rachel Culp-Hill, Yuelong Guo, Mark T. Gladwin, Grier Page, Steven Kleinman, Marion Lanteri, Mars Stone, Michael P. Busch, and James C. Zimring

Collaborative Groups: Recipient Epidemiology and Donor Evaluation Study-III (REDS III)

Disclosures: Though unrelated to the contents of this manuscripts, the authors declare that AD is a founder of Omix Technologies Inc and Altis Biosciencens LLC. James C Zimring serves as a consultant for Rubius Therapeutics. All the other authors disclose no conflicts of interest relevant to this study.

Contributions: TK, SK, MTG, ML, MS, MPB, GP, JCZ designed the study. AD, XF, JAR, RCH, JCZ performed metabolomics analyses. YG, GP performed genomics analyses. TK performed oxidative hemolysis measurements. AD prepared figures and wrote the first version of the manuscript. All the authors contributed to the finalization of the manuscript.
