# Supplementary material for: Donor sex, age and ethnicity impact stored red blood cell antioxidant metabolism through mechanisms in part explained by glucose 6-phosphate dehydrogenase levels and activity
Source: PubMed Central journal article supplement — Haematologica. 2020 Apr 2;106(5):1290–302. doi: 10.3324/haematol.2020.246603 (PMC8094095; doi:10.3324/haematol.2020.246603), 2020-04-02
Supplement: 2020_246603_D_ALESSANDRO_SUPPL.pdf [file 2020_246603_D_ALESSANDRO_SUPPL.pdf]

## Donor sex, age and ethnicity impact stored red blood cell antioxidant metabolism through mechanisms in part explained by glucose 6-phosphate dehydrogenase levels and activity

Angelo D'Alessandro,<sup>1,2,3</sup> Xiaoyun Fu,<sup>4</sup> Tamir Kaniias,<sup>3,5</sup> Julie A. Reisz,<sup>1</sup> Rachel Culp-Hill,<sup>1</sup> Yuelong Guo,<sup>6</sup> Mark T. Gladwin,<sup>5</sup> Grier Page,<sup>6</sup> Steve Kleinman,<sup>7</sup> Marion Lanteri,<sup>8</sup> Mars Stone,<sup>8</sup> Michael P. Busch,<sup>8#</sup> and James C. Zimring<sup>9#</sup> for the Recipient Epidemiology and Donor Evaluation Study-III (REDS III)

<sup>1</sup>Department of Biochemistry and Molecular Genetics, University of Colorado Denver – Anschutz Medical Campus, Aurora, CO, USA; <sup>2</sup>Department of Medicine – Division of Hematology, University of Colorado Denver – Anschutz Medical Campus, Aurora, CO, USA; <sup>3</sup>Vitalant Research Institute (previously Blood Systems Research Institute), Denver, CO, USA; <sup>4</sup>Bloodworks Northwest Research Institute, Seattle, WA, USA; <sup>5</sup>University of Pittsburgh, Pittsburgh, PA, USA; <sup>6</sup>RTI International, Atlanta, GA, USA; <sup>7</sup>University of British Columbia, Victoria, Canada; <sup>8</sup>Vitalant Research Institute (previously Blood Systems Research Institute), San Francisco, CA, USA and <sup>9</sup>University of Virginia, Charlottesville, VA, USA

*#MPB and JCZ contributed equally as co-senior authors*

©2021 Ferrata Storti Foundation. This is an open-access paper. doi:10.3324/haematol.2020.246603

Received: January 7, 2020.

Accepted: March 27, 2020.

Pre-published: April 2, 2020.

Correspondence: ANGELO D'ALESSANDRO - [angelo.dalessandro@ucdenver.edu](mailto:angelo.dalessandro@ucdenver.edu)

---

# SUPPLEMENTARY MATERIAL

## TABLE OF CONTENTS

|                                                                                               |           |
|-----------------------------------------------------------------------------------------------|-----------|
| <b>SUPPLEMENTARY INTRODUCTION .....</b>                                                       | <b>2</b>  |
| <b>SUPPLEMENTARY MATERIALS AND METHODS EXTENDED.....</b>                                      | <b>5</b>  |
| <b>SUPPLEMENTARY REFERENCES.....</b>                                                          | <b>6</b>  |
| <b>SUPPLEMENTARY FIGURES.....</b>                                                             | <b>10</b> |
| <i>SUPPLEMENTARY FIGURE 1 .....</i>                                                           | <i>10</i> |
| <i>SUPPLEMENTARY FIGURE 2 .....</i>                                                           | <i>11</i> |
| <i>SUPPLEMENTARY FIGURE 3 .....</i>                                                           | <i>12</i> |
| <i>SUPPLEMENTARY FIGURE 4 .....</i>                                                           | <i>13</i> |
| <i>SUPPLEMENTARY FIGURE 5 .....</i>                                                           | <i>14</i> |
| <i>SUPPLEMENTARY FIGURE 6 .....</i>                                                           | <i>15</i> |
| <b>SUPPLEMENTARY TABLE 1 – METABOLIC CORRELATES TO OXIDATIVE HEMOLYSIS..... APPENDIX .XLS</b> |           |
| <b>LEGEND TO SUPPLEMENTARY TABLE 1.....</b>                                                   | <b>16</b> |

## Supplementary INTRODUCTION – EXTENDED

Over the past decade the application of omics technologies<sup>1</sup> and particularly metabolomics<sup>2</sup> to the field of red blood cell (RBC) storage has exponentially expanded our understanding of the temporal sequence and mechanisms of the storage lesion. Indeed, while refrigerated storage in the blood bank is a logistic necessity to make ~110 million units available for transfusion every year worldwide, the process comes at a significant cost in terms of RBC structural<sup>3-5</sup> and biochemical homeostasis.<sup>1</sup> Some of these “storage lesions”<sup>6</sup> are inevitable, since refrigeration temperatures negatively impact the activity of key enzymes regulating red cell energy<sup>7</sup> and ion pump homeostasis<sup>8,9</sup>. Glycolysis is further inhibited by intracellular acidification as a function of lactate accumulation, a phenomenon that is observed during storage in all currently licensed storage additives, including SAGM<sup>9-12</sup>, additive solutions 1<sup>13</sup>, 3<sup>14,15</sup>, 5<sup>16</sup> and PAGGSM<sup>17,18</sup>, and is in part counteracted by the adoption of next generation alkaline storage additives.<sup>17,19-21</sup> In small scale studies, the metabolic lesion has been reproducibly assessed to a quantifiable extent, which allowed the definition of metabolic markers of the so-called “metabolic age” of stored RBCs.<sup>3,22,23</sup> These markers are so robust that in prior double-blinded metabolomics studies we could accurately predict the storage age of >98.7% of 599 stored RBC samples.<sup>24</sup> Despite the consistency of these laboratory observations, it is still a matter of debate whether the (metabolic) storage lesion could represent an etiological contributor to (or a reliable predictor of) transfusion outcomes in the recipient.<sup>25</sup> Indeed, storage-induced impairments in the homeostasis of high energy phosphate compounds adenosine triphosphate (ATP) and 2,3-diphosphoglycerate (DPG) should negatively impact RBC capacity to bind and off-load oxygen upon transfusion.<sup>26</sup> Depletion of ATP and DPG could represent a concern in massively transfused patients, since the rate at which these compounds are replenished within the first 72h upon transfusion may not be sufficient to meet the oxygen metabolic demands in severely hypoxic recipients.<sup>27,28</sup> Studies in animal models and humans have shown that some small molecule metabolites could represent reliable correlates to Food and Drug Administration gold standards for stored blood quality, i.e. storage hemolysis<sup>17,29</sup> and post-transfusion recovery<sup>30-32</sup>. For example, metabolites like hypoxanthine, an ATP-breakdown and oxidation product, have been correlated to hemolysis and post-transfusion recoveries in mice and humans.<sup>17,32,33</sup> Similar correlations have been reported for lipid oxidation products.<sup>30</sup>

Despite the overwhelming evidence from in vitro studies, randomized clinical trials<sup>34-37</sup> have hitherto failed to capture any signal associated with poorer outcomes when comparing transfusion of the freshest available units versus the standard of practice. On the other hand, a recent analysis of a linked donor and recipient database indicated that transfusion of RBC units less than 35 days old was associated with a higher recipient hemoglobin increment as compared to transfusion of 35-42 day old RBC units.<sup>38</sup> The apparent inconsistencies among the studies on the age of blood in the literature could be reconciled by the appreciation of the fact that RBCs, like people, do not always age the same.<sup>39</sup> In other terms, the molecular age of blood may be a distinct parameter from the storage age calculated in days since the time of donation<sup>40</sup>. Biological variability in donors<sup>41</sup> and different RBC component processing strategies<sup>42</sup> may for example impact hemoglobin oxygen saturation across donors/components,<sup>43</sup> which in turn affects RBC susceptibility to oxidative stress during storage.<sup>32,44,45</sup> Small-scale laboratory studies corroborated the hypothesis that RBC antioxidant capacity<sup>46</sup> and storage-induced susceptibility to oxidative stress may indeed be donor-dependent<sup>47</sup>. This statement holds true when considering some categories of routinely accepted donors who are more susceptible to storage-induced oxidative stress owing to common enzymopathies. For example, deficiency of glucose 6-phosphate dehydrogenase (G6PD) activity affects ~400 million people worldwide, including ~10% of the African American donor population in some metropolitan areas.<sup>48</sup> These subjects are characterized by a decreased capacity to activate the pentose phosphate pathway (PPP) and thus to generate the NADPH necessary to reduce oxidized glutathione and NADPH-dependent antioxidant enzymes<sup>48</sup>. RBCs from G6PD deficient donors are characterized by altered energy and redox metabolism<sup>49,50</sup>, a feature that has been preliminarily associated with poorer capacity to circulate upon transfusion to sickle cell recipients<sup>51</sup> and poorer post-transfusion recoveries in autologous volunteers.<sup>52</sup> As such, population screening in regions where the prevalence of G6PD deficiency is 3–5% or greater (in males) is recommended by the World Health Organization (WHO),<sup>53</sup> but no specific screening for G6PD activity is routinely in place for blood donors in the United States.

In the past few years, large scale studies have been designed to focus on the impact of donor biology on storage quality and transfusion outcomes. Within the framework of the National Heart Lung and Blood Institute (NHLBI, NIH) Recipient Epidemiology and Donor Evaluation Study (REDS)-III RBC-Omics study, four blood centers across the United States enrolled ~13,800 healthy donor volunteers of different ages, sex and ethnicities. Preliminary analyses of the data

obtained from this cohort allowed us to conclude that (i) donor sex (and testosterone levels<sup>54</sup>), age and ethnicity impact the hemolytic propensity of stored RBCs<sup>55,56</sup>; (ii) stored RBC from multiple units donated by the same donors have a similar propensity to hemolyze following pro-oxidant or osmotic insults;<sup>57</sup> and (iii) the storage duration contributes to explain ~13% of the total metabolic heterogeneity of stored RBCs, a percentage similar to the impact noted for storage additives in a subgroup of recalled donors from the original RBC-Omics cohort.<sup>24</sup>

In the light of this background, the continued characterization of the impact of donor biology on storability and transfusion outcomes is a critical step towards the establishment of personalized transfusion medicine practices. In the present study we sought to expand the characterization of the metabolic mechanisms that contribute to explaining donor and storage-dependencies of hemolysis following oxidative insults. Leveraging the RBC-Omics recalled donor population (which enrolled 662 subjects with extremes in hemolytic propensity from a screened original cohort of ~13,800 consenting donors), we performed metabolomics analyses on 599 samples from 250 donors of different ages, sex, ethnicities. We thus correlated metabolic measurements to oxidative hemolysis and biological variables like donor sex, age and ethnicity, both as a function of or independently of storage duration.

## Supplementary METHODS – EXTENDED

***Sample processing and metabolite extraction:*** An isotopically labeled internal standard mixture including a mix of  $^{13}\text{C}^{15}\text{N}$ -labeled amino acid standards (2.5  $\mu\text{M}$ ) was prepared in methanol. A volume of 100 $\mu\text{l}$  of frozen RBC aliquots was mixed with water and the mixture of isotopically labeled internal standards (1:1:1, v/v/v). The samples were extracted with methanol (final concentration of 80% methanol). After incubation at  $-20^{\circ}\text{C}$  for 1 hour, the supernatants were separated by centrifugation and stored at  $-80^{\circ}\text{C}$  until analysis. Samples were vortexed<sup>58</sup> and insoluble material pelleted as described.<sup>59,60</sup>

***Ultra-High-Pressure Liquid Chromatography-Mass Spectrometry metabolomics:*** Analyses were performed using a Vanquish UHPLC coupled online to a Q Exactive mass spectrometer (Thermo Fisher, Bremen, Germany). Samples were analyzed using a 3 minute isocratic condition<sup>61</sup> or a 5, 9 and 17 min gradient as described.<sup>30,60</sup> Solvents were supplemented with 0.1% formic acid for positive mode runs and 1 mM ammonium acetate for negative mode runs. MS acquisition, data analysis and elaboration was performed as described.<sup>60,61</sup> Additional analyses, including untargeted analyses and Fish score calculation via MS/MS, were calculated against the ChemSpider database with Compound Discoverer 2.0 (Thermo Fisher, Bremen, Germany). Graphs and statistical analyses (either t-test or repeated measures ANOVA) were prepared with GraphPad Prism 5.0 (GraphPad Software, Inc, La Jolla, CA).

## Supplementary REFERENCES

1. D'Alessandro A, Kriebardis AG, Rinalducci S, Antonelou MH, Hansen KC, Papassideri IS, et al. An update on red blood cell storage lesions, as gleaned through biochemistry and omics technologies. *Transfusion (Paris)*. 2015 Jan;55(1):205–19.
2. Nemkov T, Hansen KC, Dumont LJ, D'Alessandro A. Metabolomics in transfusion medicine. *Transfusion (Paris)*. 2016 Apr;56(4):980–93.
3. Bardyn M, Rappaz B, Jaferzadeh K, Crettaz D, Tissot J-D, Moon I, et al. Red blood cells ageing markers: a multi-parametric analysis. *Blood Transfus*. 2017 May;15(3):239–48.
4. Blasi B, D'Alessandro A, Ramundo N, Zolla L. Red blood cell storage and cell morphology. *Transfus Med Oxf Engl*. 2012 Apr;22(2):90–6.
5. Roussel C, Monnier S, Dussiot M, Farcy E, Hermine O, Le Van Kim C, et al. Fluorescence Exclusion: A Simple Method to Assess Projected Surface, Volume and Morphology of Red Blood Cells Stored in Blood Bank. *Front Med*. 2018;5:164.
6. Yoshida T, Prudent M, D'alessandro A. Red blood cell storage lesion: causes and potential clinical consequences. *Blood Transfus Trsfus Sangue*. 2019 Jan;17(1):27–52.
7. Yurkovich JT, Zielinski DC, Yang L, Paglia G, Rolfsson O, Sigurjónsson ÓE, et al. Quantitative time-course metabolomics in human red blood cells reveal the temperature dependence of human metabolic networks. *J Biol Chem*. 2017 01;292(48):19556–64.
8. Gatto C, Milanick M. Red Blood Cell Na pump: Insights from Species Differences. *Blood Cells Mol Dis*. 2009;42(3):192–200.
9. D'Alessandro A, D'Amici GM, Vaglio S, Zolla L. Time-course investigation of SAGM-stored leukocyte-filtered red blood cell concentrates: from metabolism to proteomics. *Haematologica*. 2012 Jan;97(1):107–15.
10. Gevi F, D'Alessandro A, Rinalducci S, Zolla L. Alterations of red blood cell metabolome during cold liquid storage of erythrocyte concentrates in CPD-SAGM. *J Proteomics*. 2012 Dec 5;76 Spec No.:168–80.
11. Bordbar A, Johansson PI, Paglia G, Harrison SJ, Wichuk K, Magnusdottir M, et al. Identified metabolic signature for assessing red blood cell unit quality is associated with endothelial damage markers and clinical outcomes. *Transfusion (Paris)*. 2016 Apr;56(4):852–62.
12. Pertinhez TA, Casali E, Lindner L, Spisni A, Baricchi R, Berni P. Biochemical assessment of red blood cells during storage by 1H nuclear magnetic resonance spectroscopy. Identification of a biomarker of their level of protection against oxidative stress. *Blood Transfus*. 2014 Oct;12(4):548–56.
13. Roback JD, Josephson CD, Waller EK, Newman JL, Karatela S, Uppal K, et al. Metabolomics of ADSOL (AS-1) red blood cell storage. *Transfus Med Rev*. 2014 Apr;28(2):41–55.
14. D'Alessandro A, Nemkov T, Yoshida T, Bordbar A, Palsson BO, Hansen KC. Citrate metabolism in red blood cells stored in additive solution-3. *Transfusion (Paris)*. 2017;57(2):325–36.
15. D'Alessandro A, Nemkov T, Kelher M, West BF, Schwindt RK, Banerjee A, et al. Routine Storage of Red Blood Cell Units in Additive Solution-3: a comprehensive investigation of the RBC metabolome. *Transfusion (Paris)*. 2015 Jun;55(6):1155–68.
16. D'Alessandro A., Hansen K. C., Silliman C. C., Moore E. E., Kelher M., Banerjee A. Metabolomics of AS-5 RBC supernatants following routine storage. *Vox Sang*. 2014 Sep 9;108(2):131–40.

17. D'Alessandro A, Reisz JA, Culp-Hill R, Korsten H, van Bruggen R, de Korte D. Metabolic effect of alkaline additives and guanosine/gluconate in storage solutions for red blood cells. *Transfusion (Paris)*. 2018 Apr 6;
18. Rolfsson Ó., Sigurjonsson Ó. E., Magnusdottir M., Johannsson F., Paglia G., Guðmundsson S., et al. Metabolomics comparison of red cells stored in four additive solutions reveals differences in citrate anticoagulant permeability and metabolism. *Vox Sang*. 2017 Mar 31;112(4):326–35.
19. D'Alessandro A, Nemkov T, Hansen KC, Szczepiorowski ZM, Dumont LJ. Red blood cell storage in additive solution-7 preserves energy and redox metabolism: a metabolomics approach. *Transfusion (Paris)*. 2015 Dec;55(12):2955–66.
20. Korte D de. New additive solutions for red cells. *ISBT Sci Ser*. 2016 Jan 1;11(S1):165–70.
21. Hess JR. An update on solutions for red cell storage. *Vox Sang*. 2006 Jul;91(1):13–9.
22. Paglia G, D'Alessandro A, Rolfsson Ó, Sigurjónsson ÓE, Bordbar A, Palsson S, et al. Biomarkers defining the metabolic age of red blood cells during cold storage. *Blood*. 2016 29;128(13):e43-50.
23. D'alessandro A, Nemkov T, Reisz J, Dzieciatkowska M, Wither MJ, Hansen KC. Omics markers of the red cell storage lesion and metabolic linkage. *Blood Transfus Trasfus Sangué*. 2017 Mar;15(2):137–44.
24. D'Alessandro A, Culp-Hill R, Reisz JA, Anderson M, Fu X, Nemkov T, et al. Heterogeneity of blood processing and storage additives in different centers impacts stored Red Blood Cell metabolism as much as storage time: lessons from REDS III – Omics. *Transfusion (Paris)*. 2018;
25. Zimring James C. Widening our gaze of red blood storage haze: a role for metabolomics. *Transfusion (Paris)*. 2015 Jun 13;55(6):1139–42.
26. Yoshida T, Prudent M, D'alessandro A. Red blood cell storage lesion: causes and potential clinical consequences. *Blood Transfus Trasfus Sangué*. 2019;17(1):27–52.
27. Tsai AG, Hofmann A, Cabrales P, Intaglietta M. Perfusion vs. oxygen delivery in transfusion with “fresh” and “old” red blood cells: The experimental evidence. *Transfus Apher Sci Off J World Apher Assoc Off J Eur Soc Haemapheresis*. 2010 Aug;43(1):69–78.
28. Heaton A, Keegan T, Holme S. In vivo regeneration of red cell 2,3-diphosphoglycerate following transfusion of DPG-depleted AS-1, AS-3 and CPDA-1 red cells. *Br J Haematol*. 1989 Jan;71(1):131–6.
29. Van 't Erve TJ, Wagner BA, Martin SM, Knudson CM, Blendowski R, Keaton M, et al. The heritability of hemolysis in stored human red blood cells. *Transfusion (Paris)*. 2015 Jun;55(6):1178–85.
30. Fu X, Felcyn JR, Odem-Davis K, Zimring JC. Bioactive lipids accumulate in stored red blood cells despite leukoreduction: a targeted metabolomics study. *Transfusion (Paris)*. 2016 Oct;56(10):2560–70.
31. de Wolski K, Fu X, Dumont LJ, Roback JD, Waterman H, Odem-Davis K, et al. Metabolic pathways that correlate with post-transfusion circulation of stored murine red blood cells. *Haematologica*. 2016;101(5):578–86.
32. Nemkov T, Sun K, Reisz JA, Song A, Yoshida T, Dunham A, et al. Hypoxia modulates the purine salvage pathway and decreases red blood cell and supernatant levels of hypoxanthine during refrigerated storage. *Haematologica*. 2018 Feb;103(2):361–72.
33. Casali E, Berni P, Spisni A, Baricchi R, Pertinhez TA. Hypoxanthine: a new paradigm to interpret the origin of transfusion toxicity. *Blood Transfus*. 2016 Nov;14(6):555–6.



34. Steiner ME, Ness PM, Assmann SF, Triulzi DJ, Sloan SR, Delaney M, et al. Effects of red-cell storage duration on patients undergoing cardiac surgery. *N Engl J Med*. 2015 Apr 9;372(15):1419–29.
35. Fergusson DA, Hébert P, Hogan DL, LeBel L, Rouvinez-Bouali N, Smyth JA, et al. Effect of fresh red blood cell transfusions on clinical outcomes in premature, very low-birth-weight infants: the ARIPI randomized trial. *JAMA*. 2012 Oct 10;308(14):1443–51.
36. Heddle NM, Cook RJ, Arnold DM, Liu Y, Barty R, Crowther MA, et al. Effect of Short-Term vs. Long-Term Blood Storage on Mortality after Transfusion. *N Engl J Med*. 2016 17;375(20):1937–45.
37. Lacroix J, Hébert PC, Fergusson DA, Tinmouth A, Cook DJ, Marshall JC, et al. Age of transfused blood in critically ill adults. *N Engl J Med*. 2015 Apr 9;372(15):1410–8.
38. Roubinian NH, Westlake M, St Lezin EM, Edgren G, Brambilla DJ, Lee C, et al. Association of donor age, body mass index, hemoglobin, and smoking status with in-hospital mortality and length of stay among red blood cell-transfused recipients. *Transfusion (Paris)*. 2019 Nov;59(11):3362–70.
39. D'Alessandro A. From Omics Technologies to Personalized Transfusion Medicine. *Expert Rev Proteomics*. 2019 Jan 18;
40. Koch CG, Duncan AI, Figueroa P, Dai L, Sessler DI, Frank SM, et al. Real Age: Red Blood Cell Aging During Storage. *Ann Thorac Surg* [Internet]. 2018 Oct 17 [cited 2018 Oct 23]; Available from: <http://www.sciencedirect.com/science/article/pii/S0003497518314954>
41. Bardyn M, Maye S, Lesch A, Delobel J, Tissot J-D, Cortés-Salazar F, et al. The antioxidant capacity of erythrocyte concentrates is increased during the first week of storage and correlated with the uric acid level. *Vox Sang*. 2017 Oct;112(7):638–47.
42. Jordan A, Chen D, Yi Q-L, Kaniyas T, Gladwin MT, Acker JP. Assessing the influence of component processing and donor characteristics on quality of red cell concentrates using quality control data. *Vox Sang*. 2016 Jul;111(1):8–15.
43. Yoshida T, Blair A, D'alessandro A, Nemkov T, Dioguardi M, Silliman CC, et al. Enhancing uniformity and overall quality of red cell concentrate with anaerobic storage. *Blood Transfus Trasfus Sanguie*. 2017 Mar;15(2):172–81.
44. Reisz JA, Wither MJ, Dzieciatkowska M, Nemkov T, Issaian A, Yoshida T, et al. Oxidative modifications of glyceraldehyde 3-phosphate dehydrogenase regulate metabolic reprogramming of stored red blood cells. *Blood*. 2016 22;128(12):e32-42.
45. Wither M, Dzieciatkowska M, Nemkov T, Strop P, D'Alessandro A, Hansen KC. Hemoglobin oxidation at functional amino acid residues during routine storage of red blood cells. *Transfusion (Paris)*. 2016 Feb;56(2):421–6.
46. Tzounakas VL, Georgatzakou HT, Kriebardis AG, Papageorgiou EG, Stamoulis KE, Foudoulaki-Paparizos LE, et al. Uric acid variation among regular blood donors is indicative of red blood cell susceptibility to storage lesion markers: A new hypothesis tested. *Transfusion (Paris)*. 2015 Nov;55(11):2659–71.
47. Tzounakas VL, Georgatzakou HT, Kriebardis AG, Voulgaridou AI, Stamoulis KE, Foudoulaki-Paparizos LE, et al. Donor variation effect on red blood cell storage lesion: a multivariable, yet consistent, story. *Transfusion (Paris)*. 2016;56(6):1274–86.
48. Francis RO, Jhang JS, Pham HP, Hod EA, Zimring JC, Spitalnik SL. Glucose-6-phosphate dehydrogenase deficiency in transfusion medicine: the unknown risks. *Vox Sang*. 2013 Nov;105(4):271–82.

49. Reisz JA, Tzounakas VL, Nemkov T, Voulgaridou AI, Papassideri IS, Kriebardis AG, et al. Metabolic Linkage and Correlations to Storage Capacity in Erythrocytes from Glucose 6-Phosphate Dehydrogenase-Deficient Donors. *Front Med*. 2017;4:248.
50. Tzounakas VL, Kriebardis AG, Georgatzakou HT, Foudoulaki-Paparizos LE, Dzieciatkowska M, Wither MJ, et al. Glucose 6-phosphate dehydrogenase deficient subjects may be better “storers” than donors of red blood cells. *Free Radic Biol Med*. 2016;96:152–65.
51. Sagiv E, Fasano RM, Luban NLC, Josephson CD, Stowell SR, Roback JD, et al. Glucose-6-phosphate-dehydrogenase deficient red blood cell units are associated with decreased posttransfusion red blood cell survival in children with sickle cell disease. *Am J Hematol*. 2018 May;93(5):630–4.
52. Francis RO, D’Alessandro A, Eisenberger A, Soffing M, Yeh R, Coronel E, et al. Donor glucose-6-phosphate dehydrogenase deficiency decreases blood quality for transfusion. *J Clin Invest*. 2020 Jan 21;
53. Glucose-6-phosphate dehydrogenase deficiency. WHO Working Group. *Bull World Health Organ*. 1989;67(6):601–11.
54. Kanas T, Sinchar D, Osei-Hwedieh D, Baust JJ, Jordan A, Zimring JC, et al. Testosterone-dependent sex differences in red blood cell hemolysis in storage, stress, and disease. *Transfusion (Paris)*. 2016 Oct;56(10):2571–83.
55. Kanas T, Lanteri MC, Page GP, Guo Y, Endres SM, Stone M, et al. Ethnicity, sex, and age are determinants of red blood cell storage and stress hemolysis: results of the REDS-III RBC-Omics study. *Blood Adv*. 2017 Jun 23;1(15):1132–41.
56. Endres-Dighe SM, Guo Y, Kanas T, Lanteri M, Stone M, Spencer B, et al. Blood, sweat, and tears: Red Blood Cell-Omics study objectives, design, and recruitment activities. *Transfusion (Paris)*. 2018 Sep 28;
57. Lanteri MC, Kanas T, Keating S, Stone M, Guo Y, Page GP, et al. Intradonor reproducibility and changes in hemolytic variables during red blood cell storage: results of recall phase of the REDS-III RBC-Omics study. *Transfusion (Paris)*. 2018 Nov 8;
58. Reisz JA, Nemkov T, Dzieciatkowska M, Culp-Hill R, Stefanoni D, Hill RC, et al. Methylation of protein aspartates and deamidated asparagines as a function of blood bank storage and oxidative stress in human red blood cells. *Transfusion (Paris)*. 2018 Dec;58(12):2978–91.
59. Nemkov T, Hansen KC, Dumont LJ, D’Alessandro A. Metabolomics in transfusion medicine. *Transfusion (Paris)*. 2016 Apr;56(4):980–93.
60. D’Alessandro A, Nemkov T, Yoshida T, Bordbar A, Palsson BO, Hansen KC. Citrate metabolism in red blood cells stored in additive solution-3. *Transfusion (Paris)*. 2017 Feb;57(2):325–36.
61. Nemkov T, Hansen KC, D’Alessandro A. A three-minute method for high-throughput quantitative metabolomics and quantitative tracing experiments of central carbon and nitrogen pathways. *Rapid Commun Mass Spectrom RCM*. 2017 Apr 30;31(8):663–73.

### **Supplementary Figures**

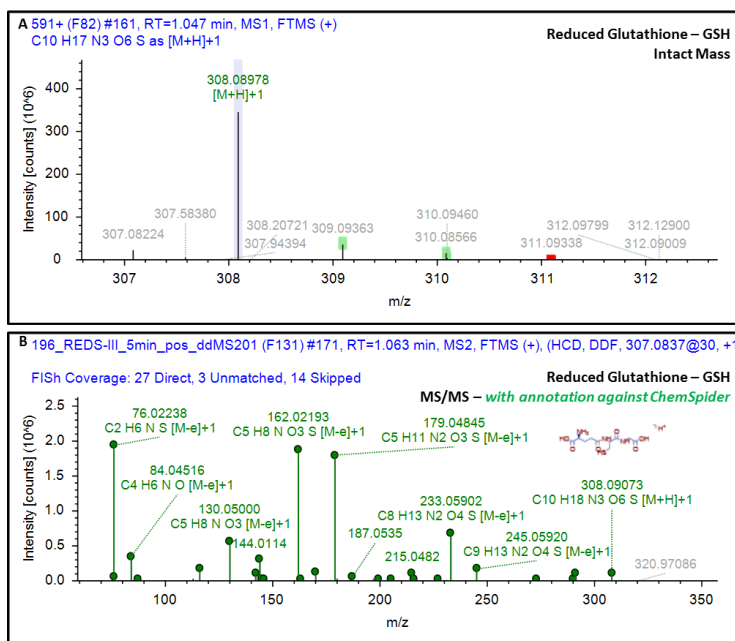

**Supplementary Figure 1** – Representative MS (top) and annotated MS/MS spectrum (bottom) for reduced glutathione (GSH), as quantified through high-throughput, high-resolution UHPLC-MS.

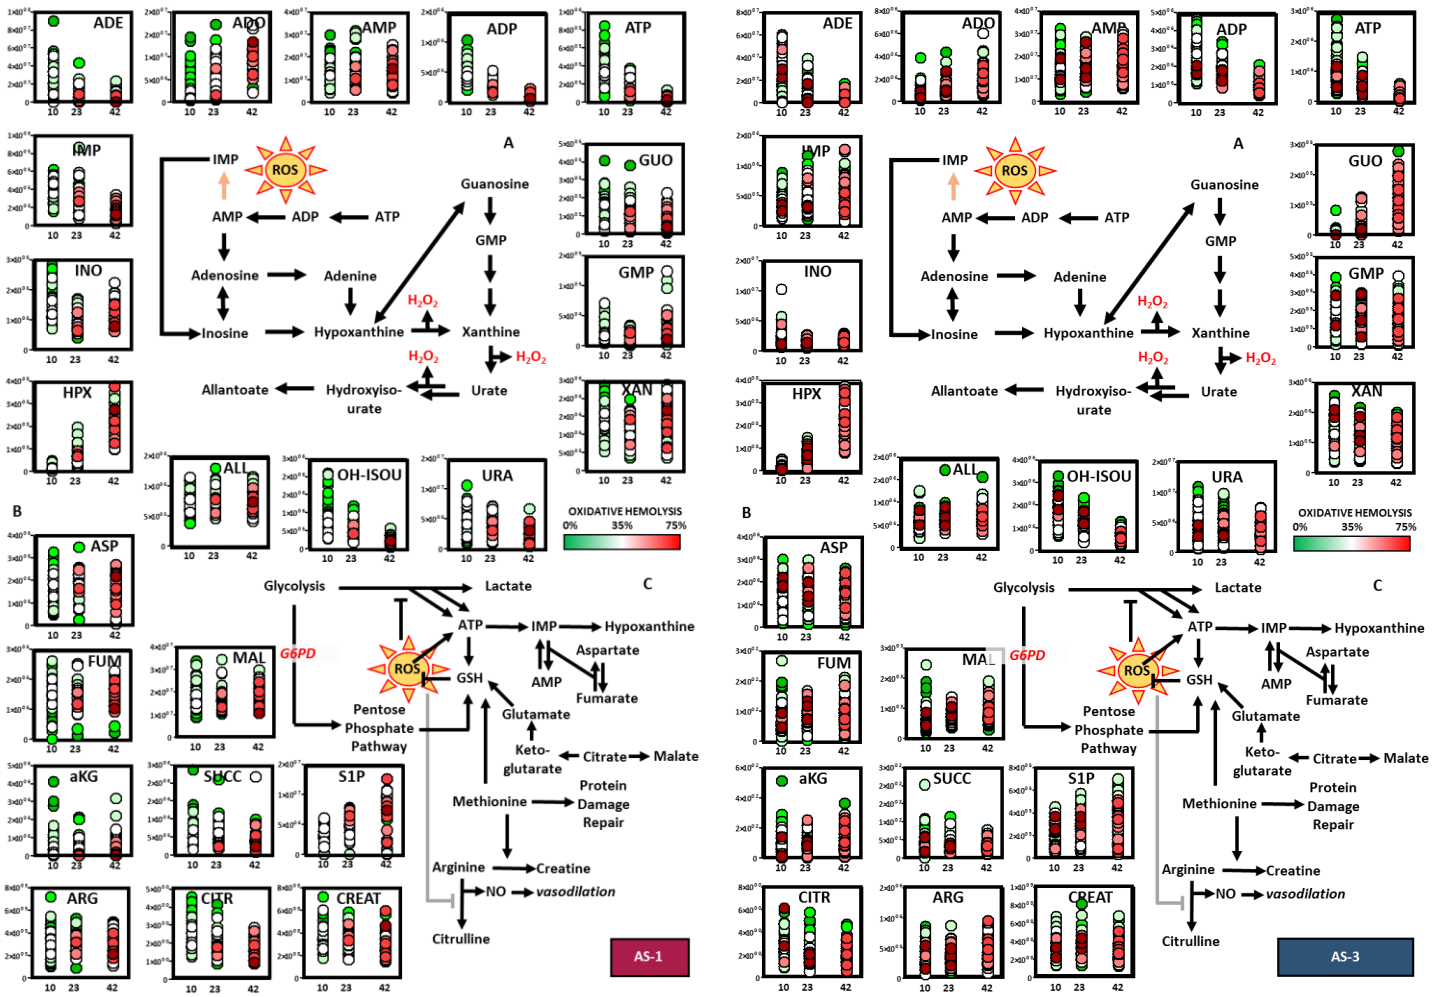

**Supplementary Figure 2** – Metabolic changes in purine metabolism and oxidation, carboxylic acid and arginine metabolism, as a function of storage additives (AS-1 – left; AS-3 – right). On the x axis of each graph, storage day 10, 23 and 42 are represented. Each dot represents an independent measurement and colors are proportional to the oxidative hemolysis measurement for the same sample (green to red = low to high oxidative hemolysis).

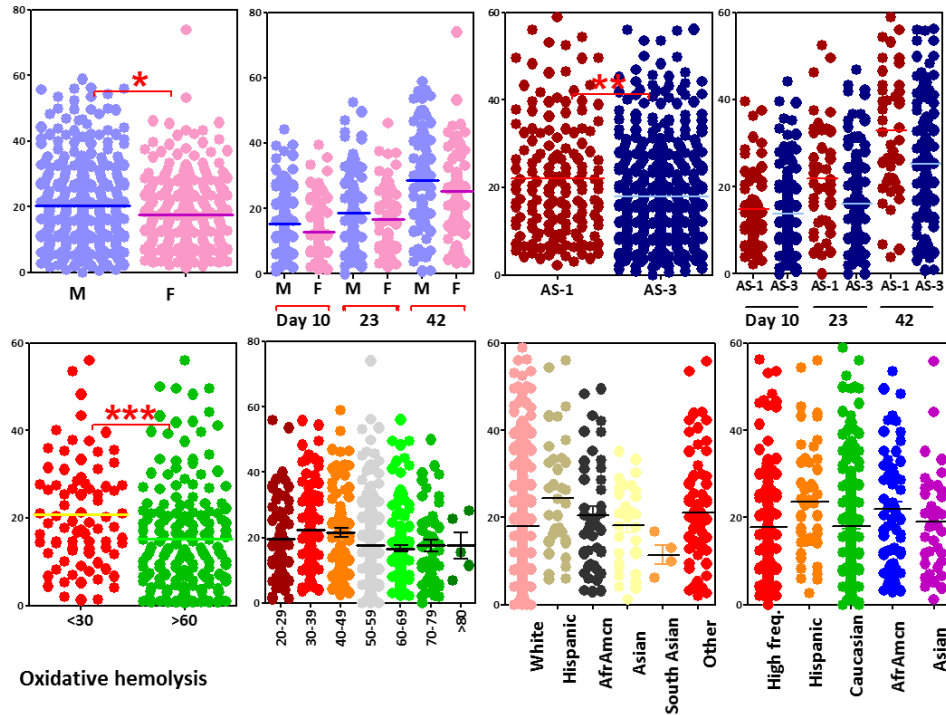

**Supplementary Figure 3** – Overview of oxidative hemolysis as a function of gender, storage additive, age, ethnicity and storage day. In the top row, the first two panels show oxidative hemolysis measurements in male (M) vs female (F) donors at any given storage day (leftmost panel) or at storage day 10, 23 and 42 (second panel). In the third and fourth panel, a similar breakdown is shown for oxidative hemolysis as a function of storage additive (AS-1 vs AS-3) at any given storage day (third panel, top row) or at storage day 10, 23 and 42 (fourth panel, top row). In the bottom row, oxidative hemolysis measurements are shown for donors younger than 30 or older than 60 (first panel), for donors of different ages broken down by decade (second panel), for different ethnicities (third panel), for ethnic group and donation frequency (last panel).

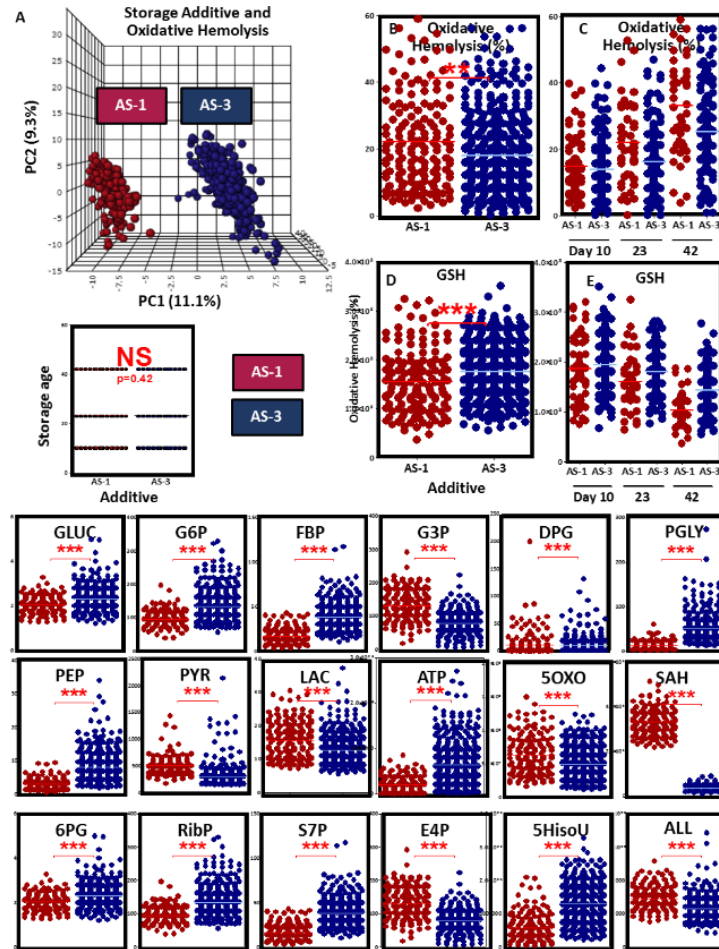

**Supplementary Figure 4** – Oxidative hemolysis as a function of storage additive (AS-1 vs AS-3 = red vs blue) (**A**). Oxidative hemolysis and reduced glutathione (GSH) are higher and lower, respectively in RBCs stored in AS-3 at any given storage day (**B-D**). Similarly, RBCs stored in AS-1 have altered glycolysis, lower activation of the pentose phosphate pathway, altered methionine and citrulline metabolism (samples are plotted with no distinction of storage days).

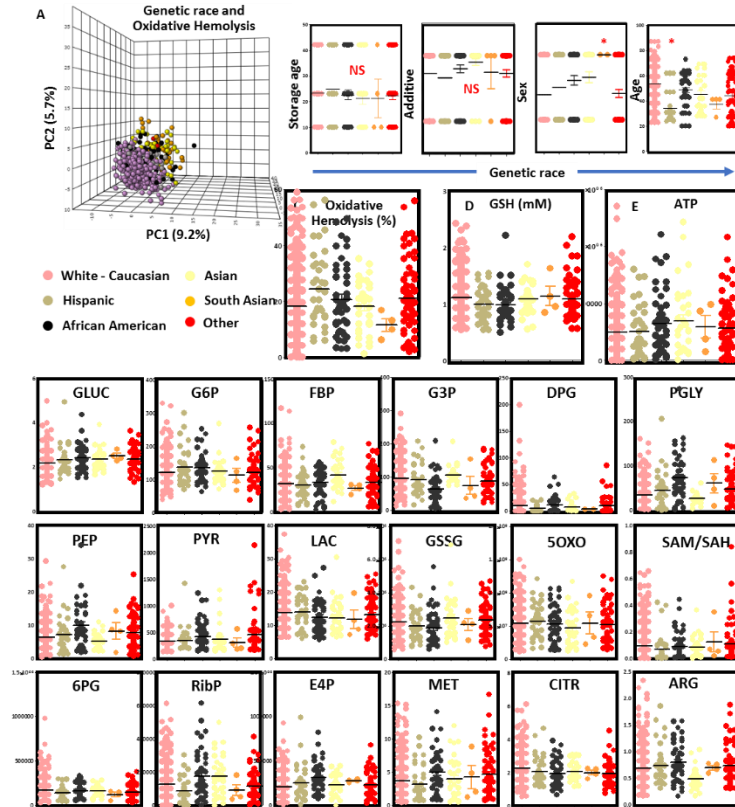

**Supplementary Figure 5** – Oxidative hemolysis as a function of donor ethnicity (**A**). Oxidative hemolysis and reduced glutathione (GSH) are higher and lower, respectively in RBCs from Hispanic and African American donors (**B-D**). Bottom panels provide an overview of glycolysis, pentose phosphate pathway, glutathione and methionine homeostasis as a function of donor ethnicity (samples are plotted with no distinction of storage days).

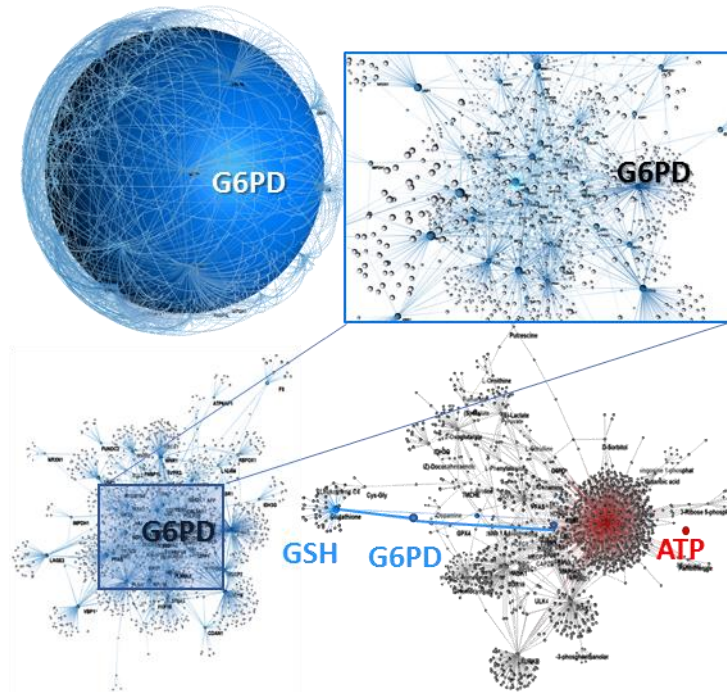

**Supplementary Figure 6** – OmicsNet elaboration of the gene-centric (top) and metabolite-centric (bottom) network view of the merged top 100 genes and metabolites correlated to oxidative hemolysis from the REDS-III Omics study confirms a central role for G6PD and GSH- or NADPH-dependent branching pathways (e.g, GPX4 and ALDH1) in mediating energy and redox homeostasis.



**SUPPLEMENTARY TABLE 1** – *please refer to the XLS appendix*

Untargeted Metabolomics data were correlated to oxidative hemolysis (Spearman's correlation).  
The top 250 positive (red) and negative correlates (blue) from this analysis are reported in  
Supplementary table 1
